# Supplementary material for: Clicker Training Mice for Improved Compliance in the Catwalk Test
Source: Animals (Basel). 2022 Dec 15;12(24):3545. doi: 10.3390/ani12243545 (PMC9774362; doi:10.3390/ani12243545)
Supplement: Supplementary file 1 [file animals-12-03545-s001.zip › animals-2079910-supplementary.pdf]

## Supplementary information

Article

# Clicker training mice for improved compliance in the Catwalk test

Jana Dickmann<sup>1</sup>, Fernando Gonzalez-Uarquin<sup>1</sup>, Sandra Reichel<sup>1</sup>, Dorothea Pichl<sup>1</sup>, Konstantin Radyushkin<sup>1</sup>, Jan Baumgart<sup>1</sup> and Nadine Baumgart<sup>1\*</sup>

<sup>1</sup> Translational Animal Research Center, University Medical Center of the Johannes Gutenberg-University, Mainz, Germany

\* Correspondence: nadine.baumgart@uni-mainz.de

### 1. Results

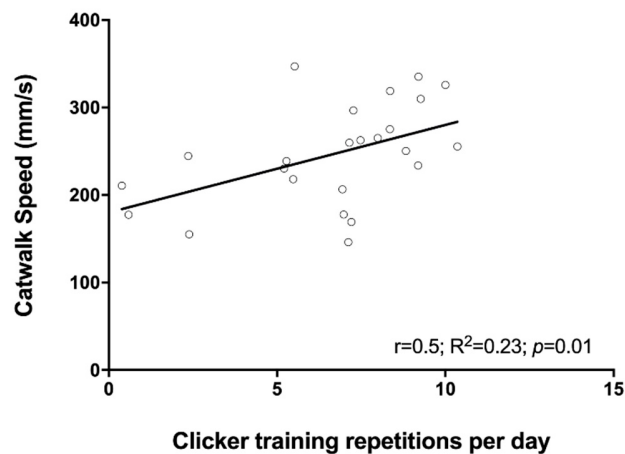

**Supplementary Figure S1.** Pearson's correlation test between clicker training (repetitions per day) and running speed (mm/s) in the CatWalk test. Each point represents an individual.

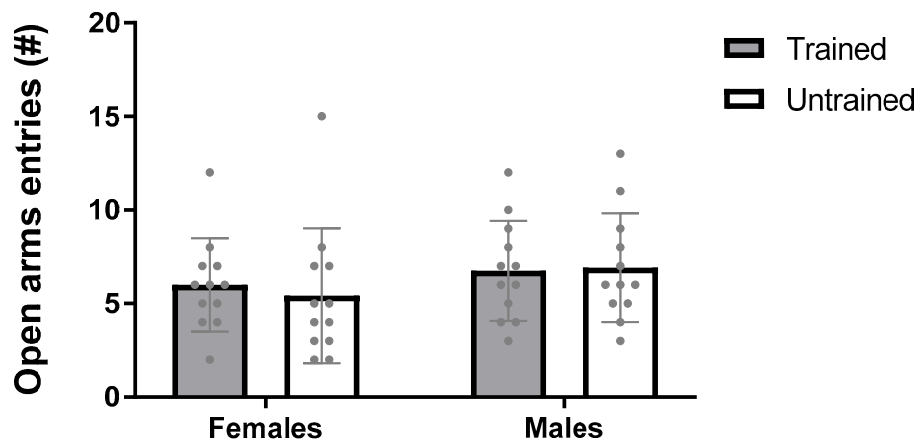

**Supplementary Figure S2.** Number of entries in the open arms of the Elevated Plus Maze (EPM) of previously trained (grey) and untrained (white) C57BL/6J mice. We used Two-way ANOVA for statistical analysis.  $n = 12$ . Each point represents an individual. Bars indicate the means  $\pm$  standard deviation.
